# Supplementary material for: Methionine-driven YTHDF1 expression facilitates bladder cancer progression by attenuating RIG-I-modulated immune responses and enhancing the eIF5B-PD-L1 axis
Source: Springer Nature journal article supplement (doi:10.1038/s41418-024-01434-y), 2024-12-13

## **Materials and methods**

### **Cell culture and treatment**

T24, 5637, UMUC-3, MB49 cell lines were obtained from American Type Culture Collection (ATCC, Manassas, VA, USA) and identified through STR profiling, with testing conducted to ensure mycoplasma-free status. The above cells were cultured in DMEM medium (Gibco) containing 10% FBS. The drugs used for cell treatment include Trifluoromethyl-tubercidin (TFMT) (HY-156048, MCE), methionine (M1952, Abmole), homocysteine (M45193, Abmole), S-adenosyl methionine (SAM) (HY-B0617A, MCE), and S-adenosylhomocysteine (SAH) (HY-19528, MCE).

### **Stable cell line construction**

The shRNA and sgRNA plasmids were constructed by GK Biotechnology (Shanghai, China), the siRNAs were constructed by RIBO Biotechnology (Guangzhou, China). The detailed sequence can be found in Table S1. Lentiviral particles were generated using a packaging system and transfected into target cells according to standard protocols. Following transfection, cells were selected with puromycin to ensure stable integration of the lentivirus.

### **qRT-PCR, RNA-seq and clinical cohorts' analysis**

Total RNA from cells was extracted using TRIzol reagent and subjected to qRT-PCR and RNA sequencing. The RNA-seq results can be found in Table S3. cDNA was synthesized using the PrimeScript RT Master Mix Kit (Takara, Tokyo, Japan), followed by real-time PCR performed with GoTaq qPCR Master Mix (Promega, Madison, USA) according to the manufacturer's guidelines. Gene expression data were normalized to GAPDH levels, and the primer sequences used are provided in Table S2. For the analysis of RNA-seq data and public databases, the GISTIC algorithm was utilized to process CNV data. Xiangya Cohort was described as we previously reported(1).

### **Amino Acid Addition and Restriction**

The 20 essential and non-essential amino acids were purchased from Abmole (Cat:M49817) and

dissolved and added to the culture medium according to the instructions. Methionine-deficient DMEM medium was purchased from Beyotime (Cat:C0891), and BLCA cells were subjected to respective tests after treatment with methionine-restricted culture medium or control medium for 12 hours. For in vivo methionine restriction diet, diets containing 0.12% methionine were obtained from Dyets Company (Wuxi, China).

### **RNA Stability Assay**

Under different culture or treatment conditions, cells were treated with 5 mg/mL actinomycin D (SBR00013, Sigma-Aldrich). Harvesting of the cells occurred at various time intervals. qRT-PCR was employed to assess the relative expression levels of mRNA at these time points.

### **Tissue specimens**

The BLCA samples were obtained from First Affiliated Hospital of Sun Yat-sen University and Xiangya Hospital of Central South University. In addition to patients diagnosed with bladder cancer through pathology, all other patients were excluded. All experiments passed the Ethics Committee of First Affiliated Hospital of Sun Yat-sen University and Xiangya Hospital of Central South University.

### **ELISA**

The ELISA kits used in the experiment are as follows: Human IFN- $\beta$  ELISA Kit (cat: E-EL-H0085, Elabscience); Mouse IFN- $\beta$  ELISA Kit (cat: E-EL-M0033, Elabscience); Met ELISA Kit (cat: MM-92614902, Meimian). The supernatant of tumor cell cultures or tissue lysates was collected and used for subsequent ELISA experiments. Poly (I:C) was purchased from Invivogen. All experiments were conducted according to the manufacturer's instructions.

### **Western blot**

Briefly, RIPA buffer was used to lyse the samples, followed by elution with 2 $\times$ SDS buffer, resolution on SDS-polyacrylamide gels, and subsequent transfer to polyvinylidene fluoride membranes. Primary antibodies were then applied to the membranes, which were subsequently incubated with horseradish peroxidase (HRP)-conjugated secondary antibodies. The primary antibodies used are as follows: RIG-I (20566-1-AP, Proteintech), MDA5 (21775-1-AP,

Proteintech), MAVS (66911-1-Ig, Proteintech), TBK1 (3504, Cell Signaling Technology), p-TBK1 (5483, Cell Signaling Technology), IRF3 (66670-1-Ig, Proteintech), p-IRF3 (29528-1-AP, Proteintech), GAPDH (60004-1-Ig, Proteintech), Histone H3 (9715, Cell Signaling Technology), H3K4me3 (9751, Cell Signaling Technology), H3K9me3 (13969, Cell Signaling Technology), H3K27me3 (9733, Cell Signaling Technology), YTHDF1 (17479-1-AP, Proteintech), Flag (YM3809, Immunoway), eIF5B (13527-1-AP, Proteintech), PD-L1 (28076-1-AP, Proteintech). Signal detection and visualization were achieved through enhanced chemiluminescence assay.

### **LDH assay**

Activated human T cells from a healthy donor were co-cultured with T24 cells in a 12-well plate for 12 hours, either in normal medium or methionine-free medium. The supernatants were collected for the LDH assay (C0016, Beyotime) following the manufacturer's protocol.

### **m<sup>6</sup>A dot blot**

TRIzol reagent was used to isolate total RNA following the manufacturer's protocol. Briefly, RNA samples underwent denaturation at 95°C for 3 minutes, followed by immediate chilling on ice. An Amersham Hybond-N<sup>+</sup> membrane was utilized to load quantified RNA samples. After UV cross-linking, 5% defatted skim milk in PBST buffer was employed to block the membrane for 1 hour. Subsequently, it was incubated with anti-m<sup>6</sup>A antibodies (68055-1-Ig, Proteintech) for 2 hours, while staining of the loading control with 0.02% methylene blue in 0.3 M sodium acetate at room temperature was performed. After three washes with PBST, the experimental membrane was exposed to HRP-conjugated goat anti-rabbit IgG for 1 hour at room temperature and then subjected to detection using Pierce ECL Plus Western Blotting Substrate (Thermo Fisher Scientific, Waltham, USA).

### **DNA dot blot**

The TIANamp Genomic DNA Kit (Cat: DP304, TIANGEN Biotech) was used to isolate total DNA according to the manufacturer's protocol. Briefly, DNA samples were diluted with 0.1 M NaOH and denatured at 95°C for 10 minutes, after which they were immediately put on ice. The remaining steps were conducted similarly to the m<sup>6</sup>A dot blot assay, but with the use of an anti-5-mC antibody (28692, Cell Signaling Technology).

## Animal Experiments

GemPharmatech (Nanjing, China) provided 6–8-week-old female C57BL/6 mice for the experiments. The animals were randomly assigned to groups and the investigator was blinded to the group allocation before the experimental procedures were performed. In the *in vivo* immune cell depletion mouse model, InVivoMAb anti-mouse CD8 $\beta$  (BE0223, BioXcell) was used to deplete CD8<sup>+</sup> T cells in mice. In the subcutaneous tumor model and immunotherapy model,  $5 \times 10^5$  MB49-shNC/MB49-shYTHDF1 cells were injected subcutaneously into the right flank of each mouse. When tumors were palpable, each mouse received intraperitoneal injections of 100  $\mu$ g anti-mouse PD-L1 (BE0101, BioXcell) antibody or IgG2a (BE0085, BioXcell) isotype control antibody every three days. Tumor volume was measured every two days using calipers or observed using the IVIS system (PerkinElmer, USA).

In the orthotopic bladder tumor model,  $5 \times 10^6$  MB49-luci cells were intravesically irrigated into the bladder after voiding. For the bladder irrigation model, VNP20009 bacteria were resuspended in PBS to a final concentration of  $1 \times 10^8$  CFU (colony forming unit)/mL, with PBS alone as control. Mice were anesthetized and a 24-gauge catheter was inserted into the bladder through the urethra, and 50  $\mu$ L of VNP20009 (purchased from BIOSCI company, Hangzhou) or PBS was instilled into the bladder. Mice were euthanized at the end of the experiment or when reaching the ethical endpoint for animal welfare. All animal experiments were approved by the Institutional Animal Care and Use Committee of Sun Yat-sen University.

## Single-cell RNA sequencing

Single-cell RNA sequencing of the tumors was performed using the 10x Genomics platform as follows: Fresh mouse tumor tissues were collected 30 days post-inoculation. Single-cell suspensions were prepared by mechanical disruption followed by enzymatic digestion with Type IV Collagenase (C5138, Sigma) and hyaluronidase (HX0514, Sigma). The suspensions were immediately processed for single-cell RNA sequencing (scRNA-seq). The resulting data were processed, and libraries were constructed according to the manufacturer's protocol.

## **Flow cytometry**

Tumor samples were collected and digested into single-cell suspensions. Subsequently, tumor-infiltrating lymphocytes (TILs) were extracted using Lymphoprep™ (07801, STEMCELL) through gradient centrifugation. After washing twice with PBS, the cells were used for subsequent experiments. For cell surface marker analysis, samples were first stained with Zombie Aqua dye (423102, Biolegend) at room temperature for 15 minutes before staining with different antibodies. The cells were resuspended and stained with specified antibodies at 4°C for 30 minutes. Intracellular fixation and permeabilization were performed using the buffer set from Invitrogen. For the detection of intracellular effector molecules and cytokines, T cells were treated with RPMI-1640 medium containing ionomycin (M3621, AbMole), PMA (M4647, AbMole), and GolgiStop (M6991, AbMole) for 4 hours. The Stained cells were detected using a BD LSRFortessa, and data analysis was conducted with FlowJo software (version 10.8.1). The antibodies were used as follows: anti-mouse CD45 (30-F11, BioLegend), anti-mouse CD8 (53-6.7, BioLegend), anti-mouse CD4 (GK1.5, Biolegend), anti-mouse CD44 (IM7, Biolegend), anti-mouse CD62L (MEL-14, Biolegend), anti-mouse IFN- $\gamma$  (XMG1.2, BioLegend) , anti-mouse TNF- $\alpha$  (MP6-XT22, BioLegend), anti-mouse PD-L1 (10F.9G2, BioLegend), anti-mouse Slamf6 (330-AJ, BioLegend), anti-mouse Cxcr6(SA051D1, BioLegend), anti-mouse MHC-I (AF6-88.5, Biolegend), anti-human PD-L1 (29E.2A3, BioLegend) and anti-human HLA-A (W6/32, BioLegend).

## **TissueFAXS panoramic analyses**

To assess the relationship between YTHDF1<sup>+</sup> cells, PD-L1<sup>+</sup> cells, RIG-1<sup>+</sup> cells, and CD8<sup>+</sup> T cells, we utilized TissueFAXS panoramic analysis (Tissue Gnostics, Austria) to detect the expression of target cells and molecules stained with multiple immunofluorescent markers in bladder cancer patients responding to immunotherapy and those resistant to it. In brief, tissue samples were prepared and fixed using formalin, followed by embedding in paraffin and sectioning at a thickness of 4-5 micrometers. The sections were stained using immunofluorescence with the TSA (tyramide signal amplification) method. High-resolution panoramic images of the stained sections were obtained using the TissueFAXS system. The images were analyzed with TissueFAXS software to quantify cellular and structural features.

## **Immunohistochemistry**

Briefly, paraffin-embedded tissues were deparaffinized, rehydrated, subjected to antigen retrieval, blocked for peroxidases, blocked again, incubated with antibodies, and stained. All reagents were from ZSGB-BIO. Scoring was independently conducted by two experienced pathologists.

### **Statistical analyses**

To compare parameters between the two groups, independent sample t-tests or Mann-Whitney U tests were employed for continuous variables, while chi-squared tests or Fisher's exact tests were used for dichotomous variables. Correlations between variables were assessed using Pearson or Spearman correlation coefficients. Kaplan-Meier survival curves illustrated prognostic analyses of dichotomous variables, with significance evaluated by the log-rank test. The similarity of variance between the groups being statistically compared was assessed. Data analyses were conducted using GraphPad Prism 8 (GraphPad Software) and R software (version 4.0). P-values below 0.05 were considered statistically significant.

**Figure S1-related to Figure 1. Effects of RIG-I and MAVS expression, mRNA stability, and m<sup>6</sup>A modification on IFN- $\beta$  production in 5637 and T24 cells under methionine restriction and IFN- $\gamma$  stimulation.** (A) IFN- $\beta$  production levels in 5637 cells under various conditions. (B) mRNA stability analysis of MAVS mRNA in 5637 cells under MFM or NM conditions following Actinomycin D treatment. (C) RIP analysis showing the relative expression of MAVS mRNA in 5637 cells with IgG or m<sup>6</sup>A antibody under MFM and NM conditions. (D) IFN- $\beta$  production in 5637 cells under different conditions. (E) IFN- $\beta$  production in T24 (left) and 5637 (right) cells under different treatment conditions. ns, P>0.05, \*P<0.05, \*\*P<0.01, \*\*\*P<0.001, \*\*\*\*P<0.0001. NM: Normal Medium, MFM: Methionine Free Medium, RIP: RNA immunoprecipitation, TFMT: Trifluoromethyl-tubercidin.

**Figure S2-related to Figure 1. The impact of IFNAR1 on functional changes induced by methionine restriction.** (A) IFN- $\beta$  production levels in 5637 cells under various conditions. (B) LDH cytotoxicity assay detecting the percentage of cytotoxicity after co-culturing T24-shNC/T24-shIFNAR1 cells with activated human PBMCs under NM and MFM conditions. (C-E) Tumor growth (C), images of tumors (D), and tumor weights (E) of MB49-shNC/MB49-shIFNAR1 in mice under CD and MRD feeding conditions. (F) Representative flow cytometry plots and bar graphs displaying the proportions of tumor-infiltrating CD4<sup>+</sup> and CD8<sup>+</sup> T cells per gram of tumor tissue in each treatment group. (G) Flow cytometry plots and bar graphs illustrating the proportions of CD8<sup>+</sup> T cells producing IFN- $\gamma$  and TNF- $\alpha$  in each treatment group. ns, P>0.05, \*P<0.05, \*\*P<0.01, \*\*\*P<0.001, \*\*\*\*P<0.0001. NM: Normal Medium, MFM: Methionine Free Medium, CD: Complete Diet, MRD: Methionine Restricted Diet.

**Figure S3-related to Figure 2. Methionine regulates the expression of YTHDF1.** (A) RNA degradation assays showed YTHDF1 RNA degradation following NM or MFM treatment in T24 and 5637 cells. (B) Schematic diagram of methionine cycle. (C-D) Western blot and RT-qPCR were used to detect YTHDF1 expression in T24 (C) and 5637 (D) cells following treatment with methionine (Met), S-adenosylmethionine (SAM), S-adenosylhomocysteine (SAH), and homocysteine (Homo-cys) at various time points. \*P<0.05, \*\*P<0.01, \*\*\*P<0.001.

30

31 **Figure S4-related to Figure 2. DDX58 is positively associated with immune infiltration in**  
32 **the TCGA-BLCA database.** (A) Heatmap of the relationship between DDX58 expression and  
33 therapeutic targets. (B) Correlation between DDX58 expression and different recruited immune  
34 cells. (C) Correlation between DDX58 expression and different infiltrated immune cells. (D)  
35 Heatmap of the relationship between DDX58 expression and molecular subtypes of bladder  
36 cancer. \*P<0.05, \*\*P<0.01, \*\*\*P<0.001.

37

38 **Figure S5-related to Figure 2. DDX58 is positively associated with interferon activation and**  
39 **survival in bladder cancer.** (A) The enrichment pathways between different DDX58 expression.  
40 (B) The survival probability of CD8 expression in TCGA-BLCA. (C) The survival probability of  
41 IFN expression in TCGA-BLCA. (D) Heatmap shows the expression of YTHDF1 and interferon-  
42 stimulated genes in T24 cells under NM and MFM conditions detected by RNA-seq. (E-F) RT-  
43 qPCR detecting the differences in YTHDF1, ISG15, MX1, IFI6 and ISG20 mRNA expression in  
44 5637 (E) and T24 (F) cells between the negative control and YTHDF1 knockdown groups.  
45 \*\*P<0.01, \*\*\*P<0.001, \*\*\*\*P<0.0001.

46

47 **Figure S6-related to Figure 4. YTHDF1 expression is negatively associated with HLA**  
48 **expression in bladder cancer.** (A) Represent Histogram and bar graph show the expression of  
49 HLA-A in shNC and shYTHDF1 T24 cells. (B) Represent Histogram and bar graph show the  
50 expression of HLA-A in shNC, shYTHDF1, shYTHDF1&shIFNAR1, shYTHDF1&shMAVS  
51 and shYTHDF1&shRIG-I T24 cells. (C) Gating strategies for flow cytometry in CD4<sup>+</sup> and CD8<sup>+</sup>  
52 T cells. (D) FMO plots for intracellular staining and gating strategies. \*P<0.05, \*\*P<0.01,  
53 \*\*\*\*P<0.0001.

54

55 **Figure S7-related to Figure 5. Methionine restriction promotes immune cell infiltration in**  
56 **bladder cancer and synergizes with immune checkpoint inhibitors.** (A) Infiltration status of  
57 different cell types among various treated groups. (B) UMAP plot of different macrophage  
58 subpopulations. (C) UMAP plot of macrophage subpopulations in different experimental  
59 treatment groups. (D) Enrichment analysis plot of differentially expressed genes in macrophages  
60 across different treatment groups. \*\*P<0.01, \*\*\*\*P<0.0001.

61

62

63 **Figure S8-related to Figure 7. YTHDF1 interacts with eIF5B and promotes the translation**  
64 **of PD-L1.** (A) Representative immunofluorescence images of tumor tissues from T24 cells  
65 showing the correlation between endogenous YTHDF1 and eIF5B. (B) Western Blot analysis

showing the expression of eIF5B and PD-L1 proteins in T24 cell line under conditions with or without IFN- $\gamma$  and methionine treatment (upper) and the expression of eIF5B and PD-L1 proteins in T24 cell line under conditions with or without IFN- $\gamma$  and shYTHDF1 (bottom). (C) Western Blot analysis showing the expression of YTHDF1, eIF5B, and PD-L1 proteins after over expression of YTHDF1 or not in T24 and 5637 cells. (D) Western Blot analysis showing the expression of eIF5B and PD-L1 proteins in different treated groups. (E) Western blot analysis of YTHDF1, eIF5B, and PD-L1 in T24 and 5637 cells treated with IFN- $\gamma$ , with or without MFM and NM, under shIFNAR1 or control conditions.

**Figure S9. Schematic diagram of the study.**

**Table S1. Sequence of shRNAs, sgRNAs and siRNAs.**

**Table S2. Primer Sequences used in RT-qPCR.**

**Table S3. RNA-seq results.**

**A**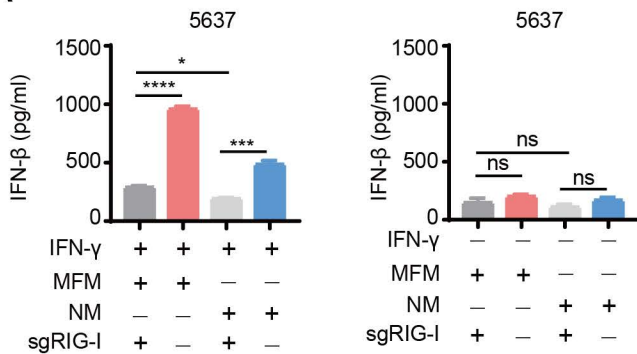**B**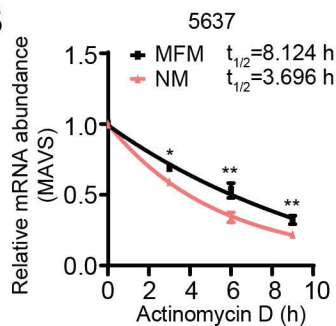**C**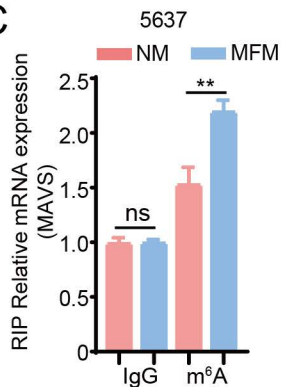**D**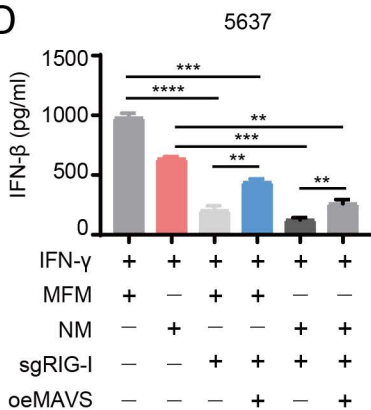**E**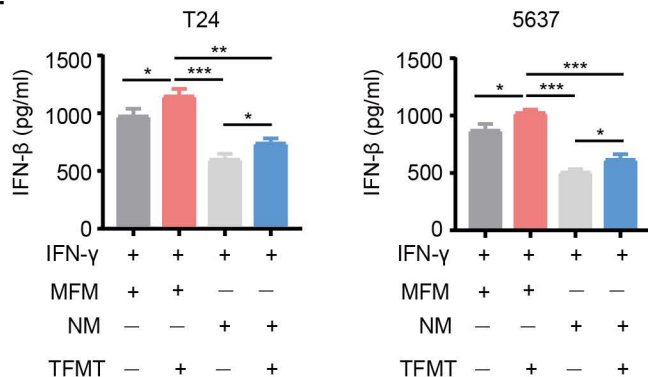

**A**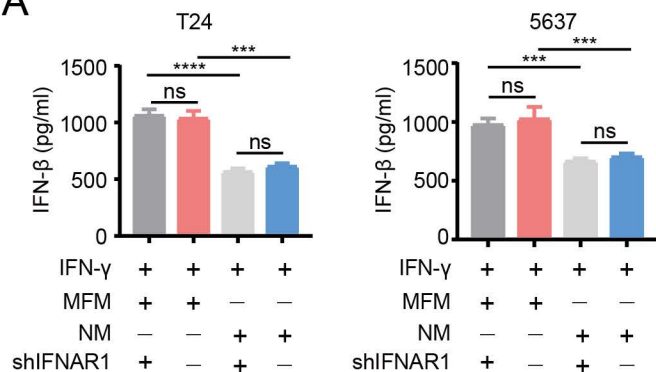**B**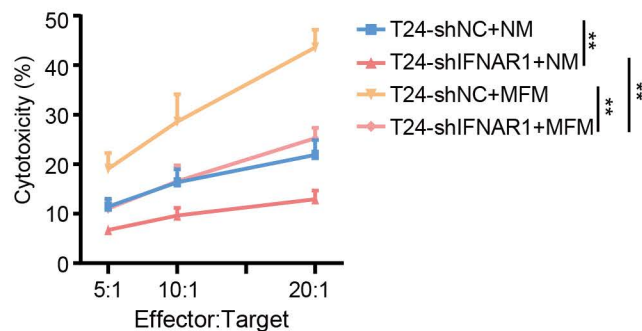**C**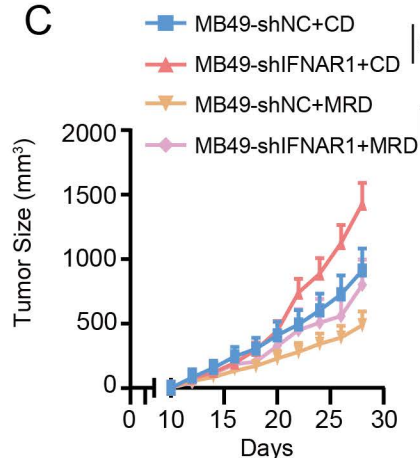**D**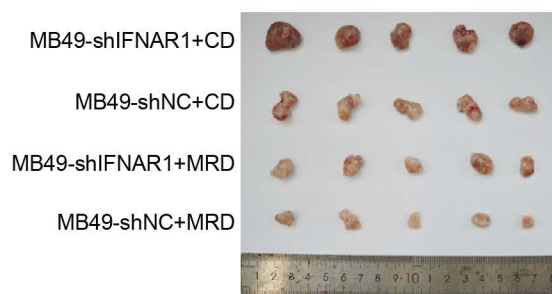**E**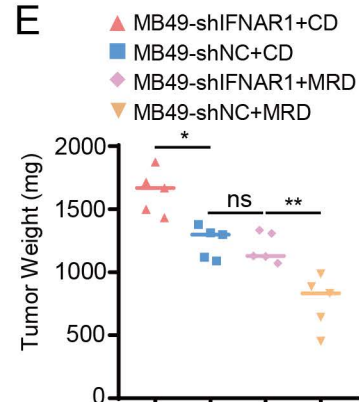**F**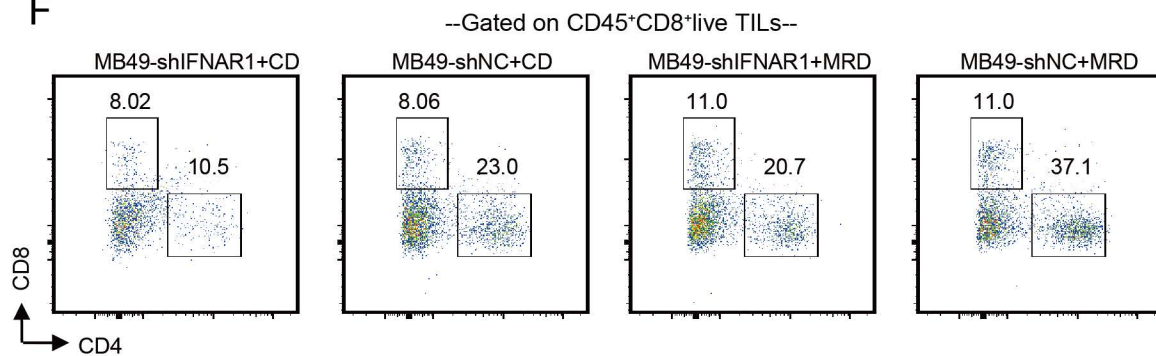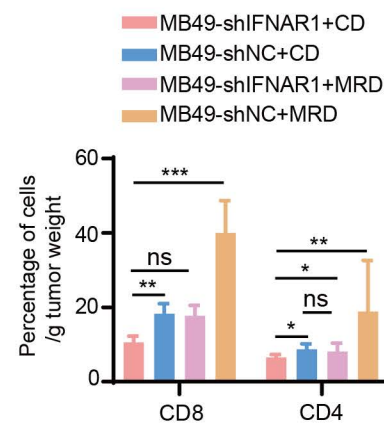**G**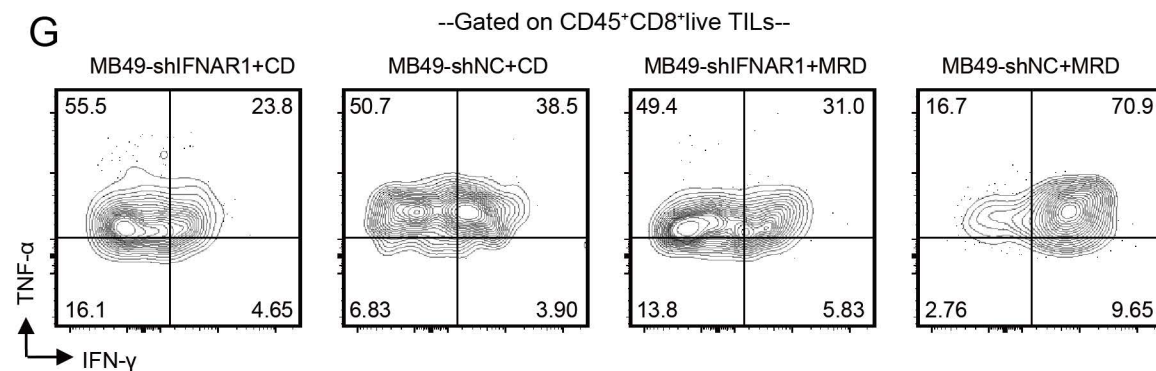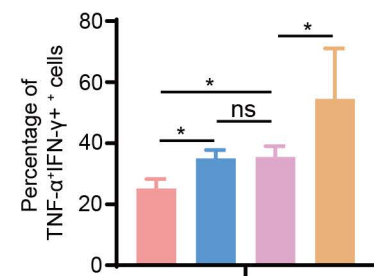

**A**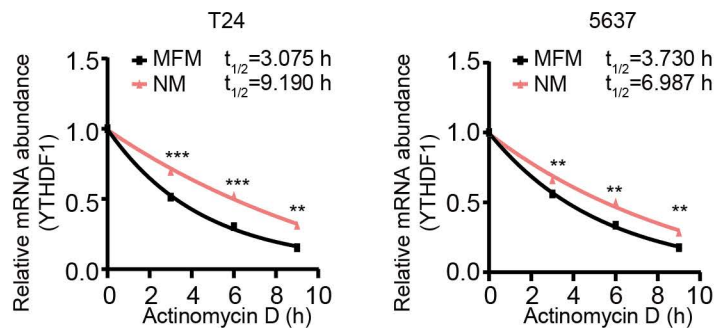**B**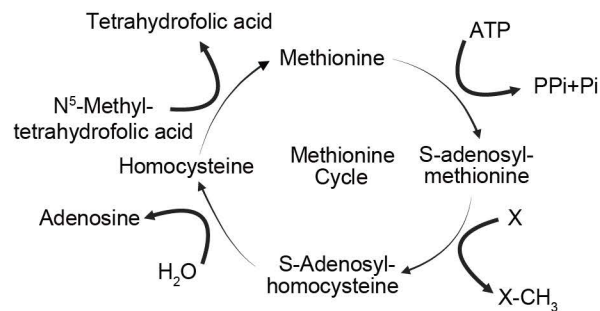**C****T24**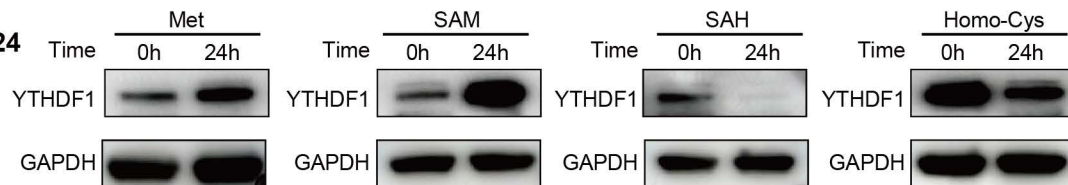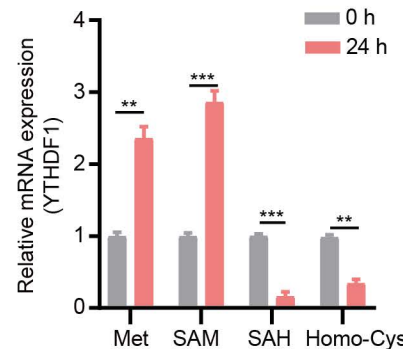**D****5637**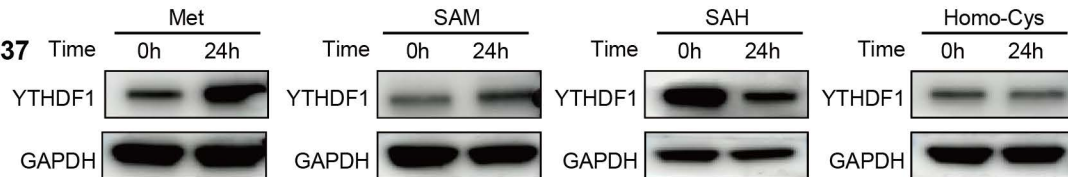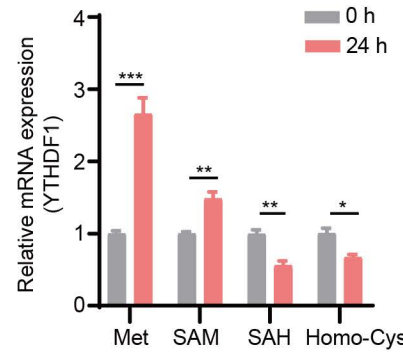

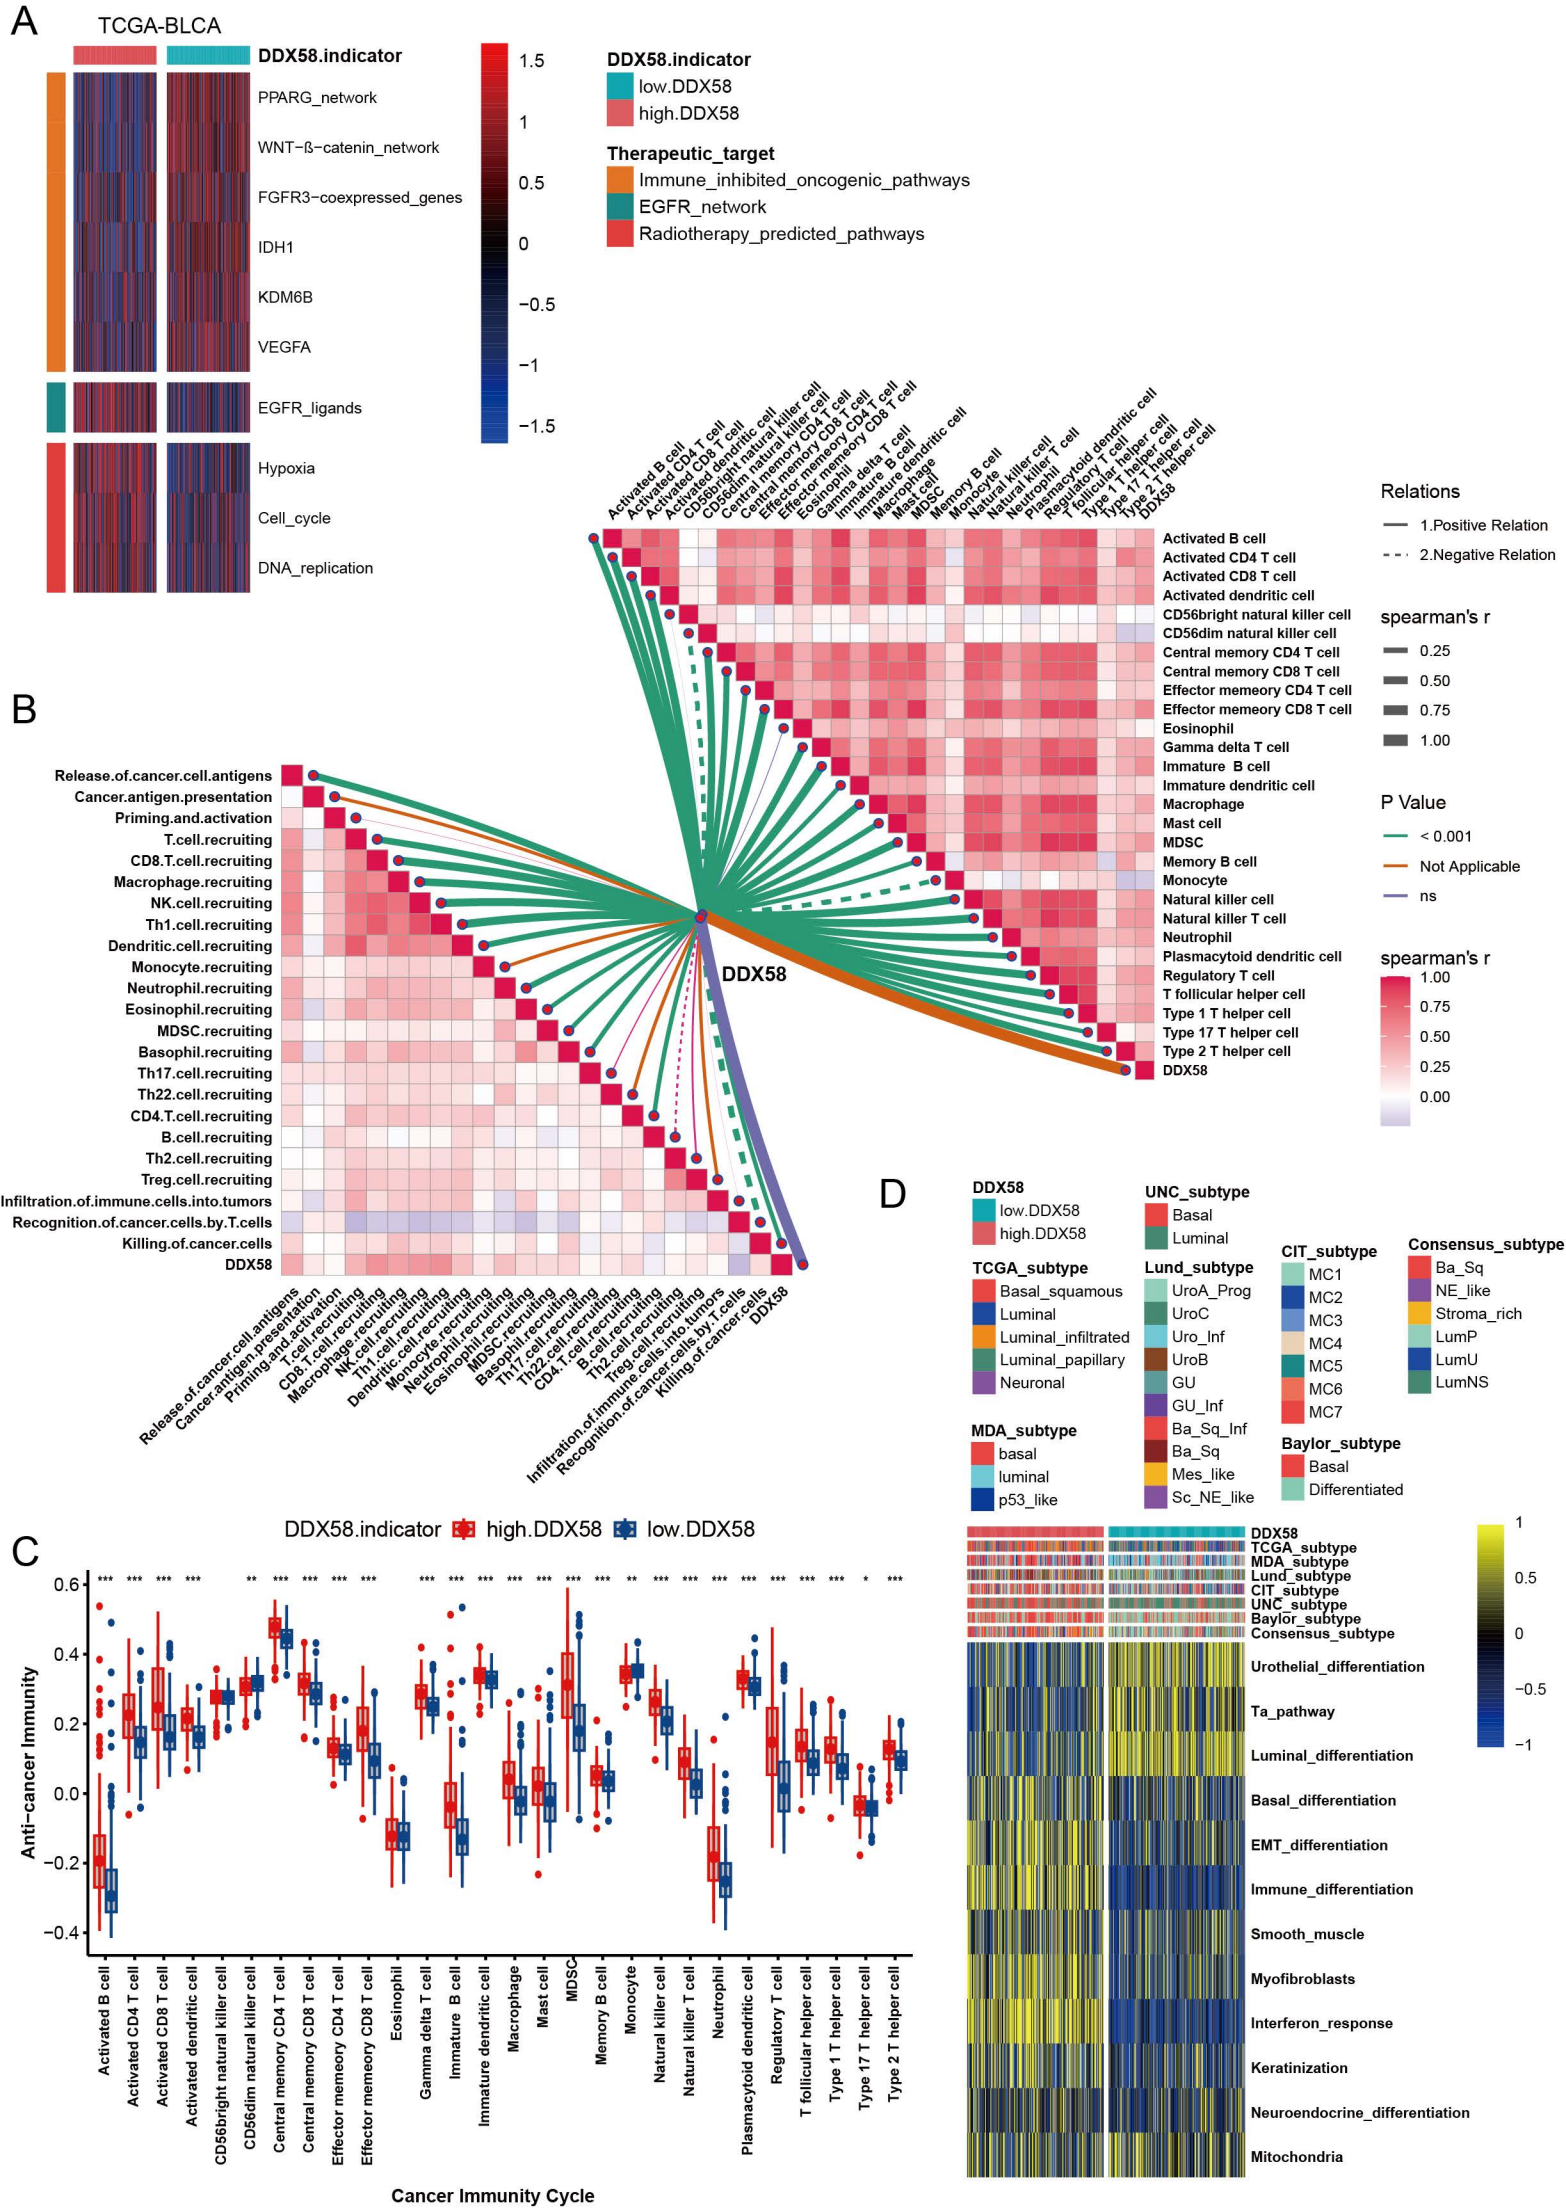

A

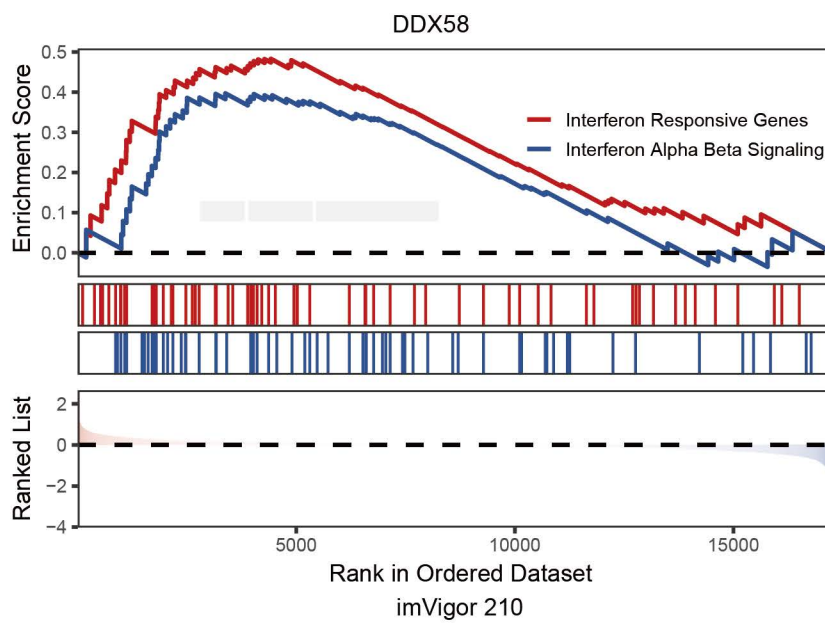

B

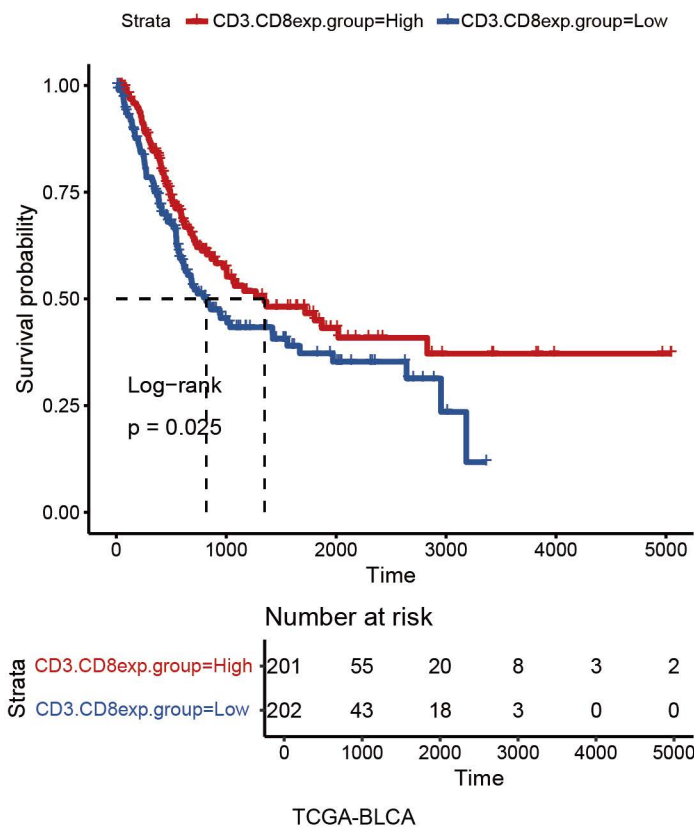

C

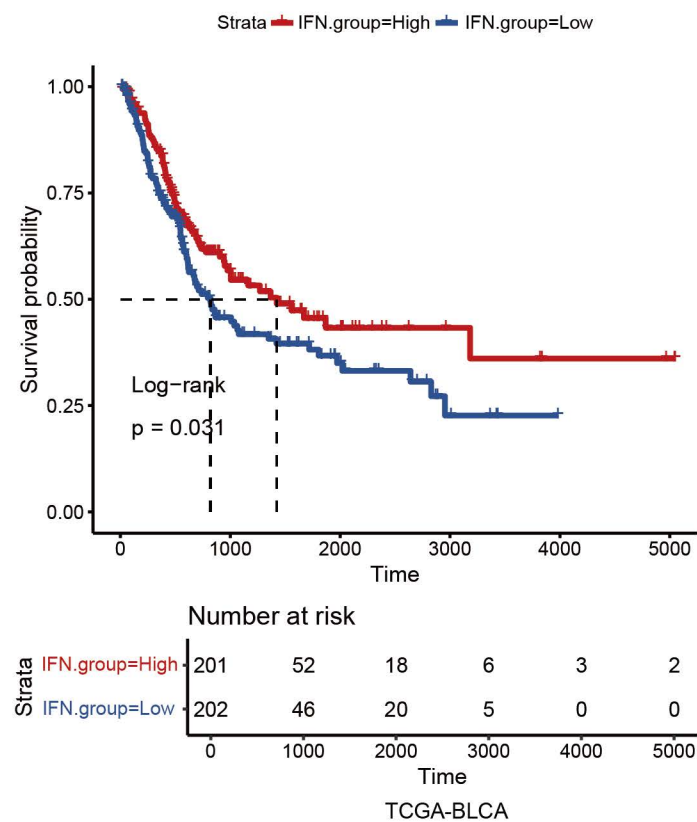

D

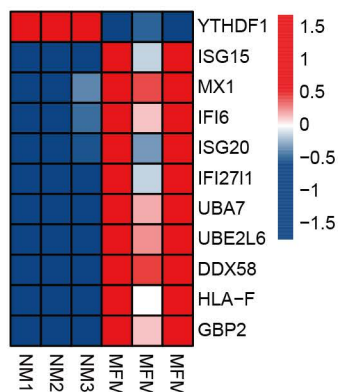

E

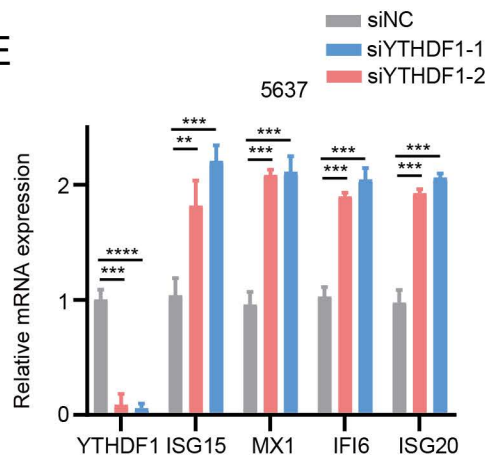

F

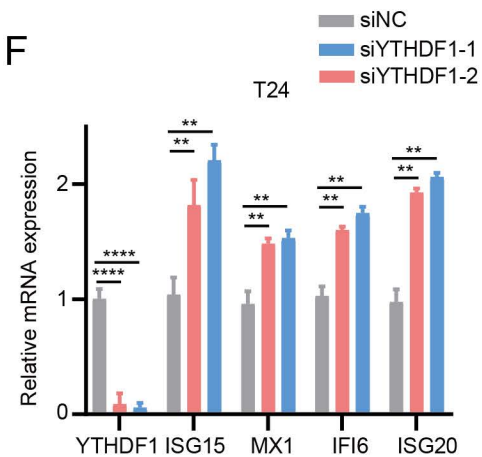

A

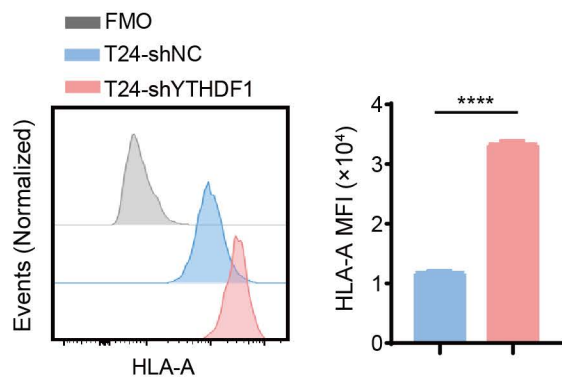

B

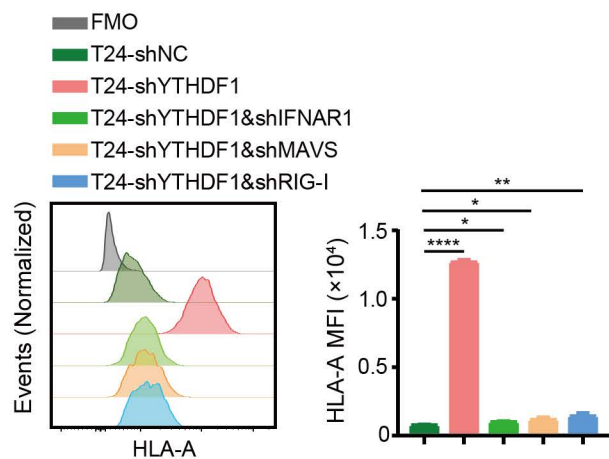

C

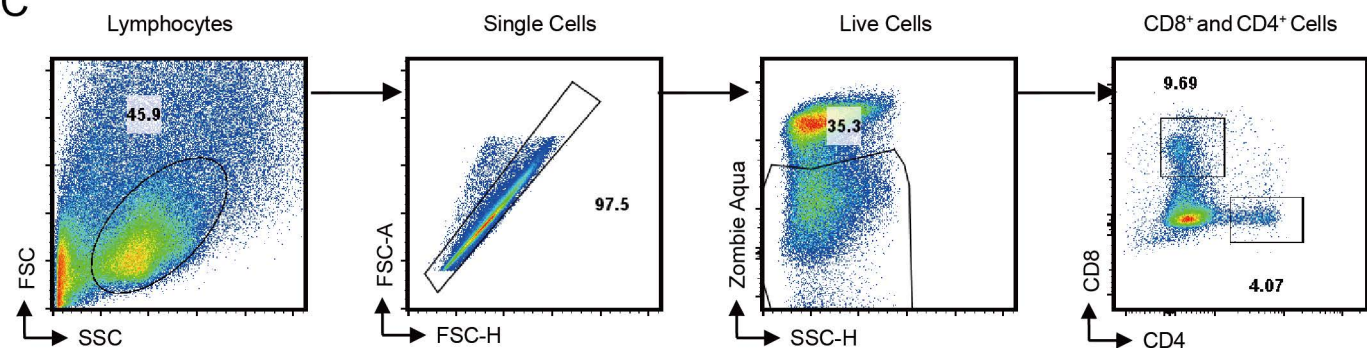

D

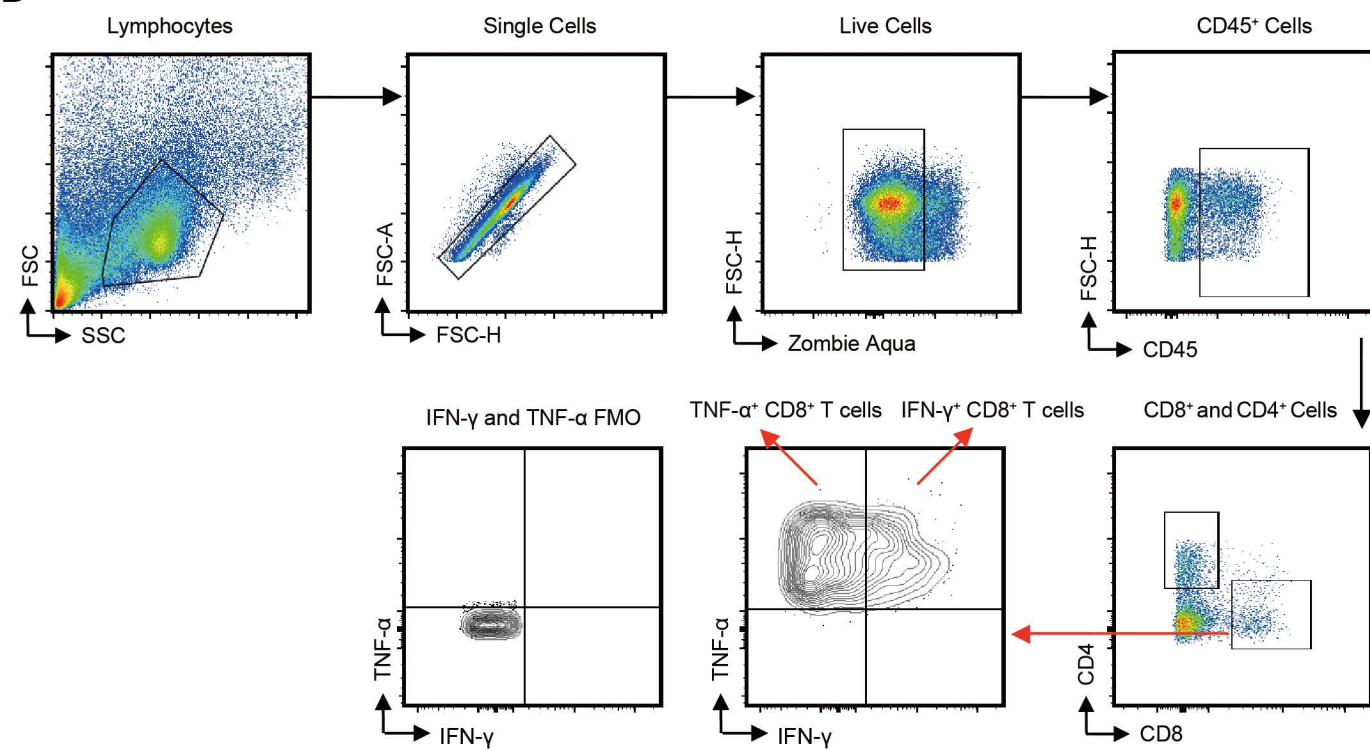



A

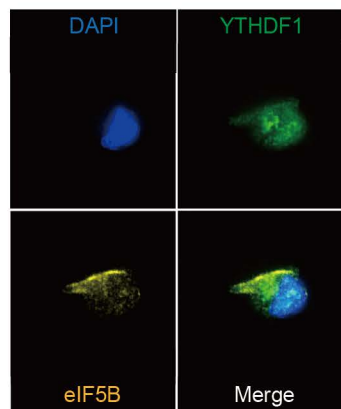

B

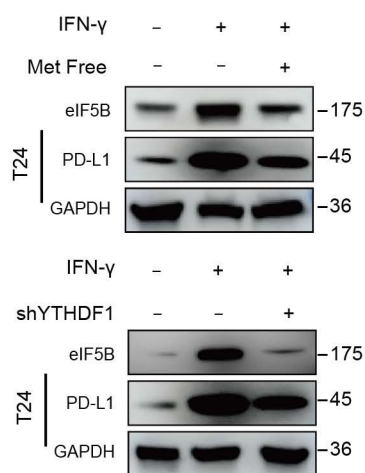

C

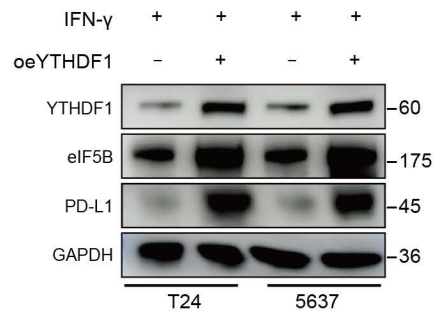

D

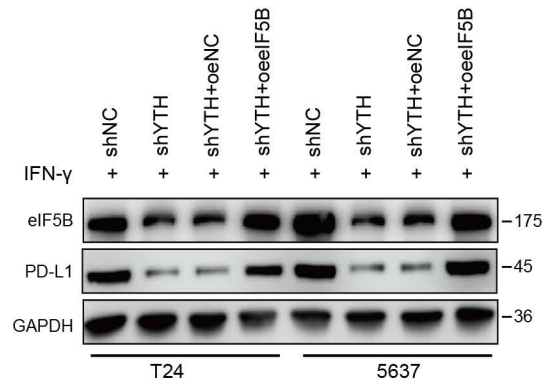

E

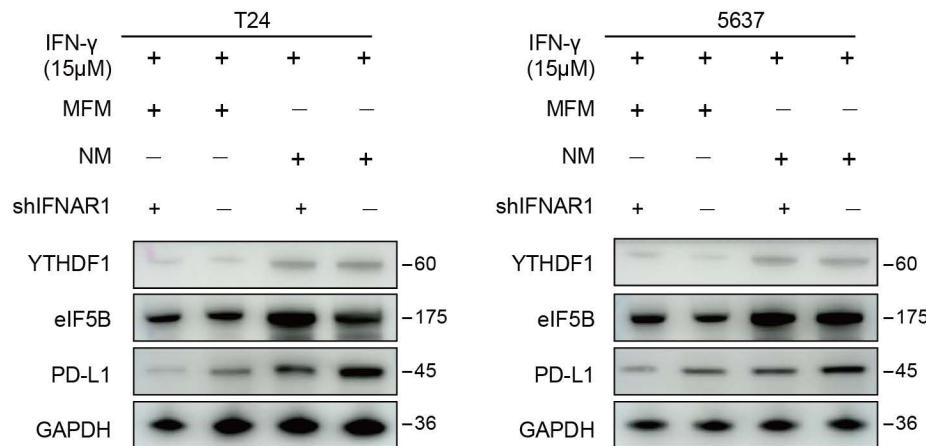

Supplement: MOESM1 [file 41418_2024_1434_MOESM1_ESM.pdf]
